# Supplementary material
Source: PubMed Central journal article supplement (PMC4473199)
Supplement: JCM.02495-14_zjm999094358so1.pdf [file JCM.02495-14_zjm999094358so1.pdf]

## Supplementary Material

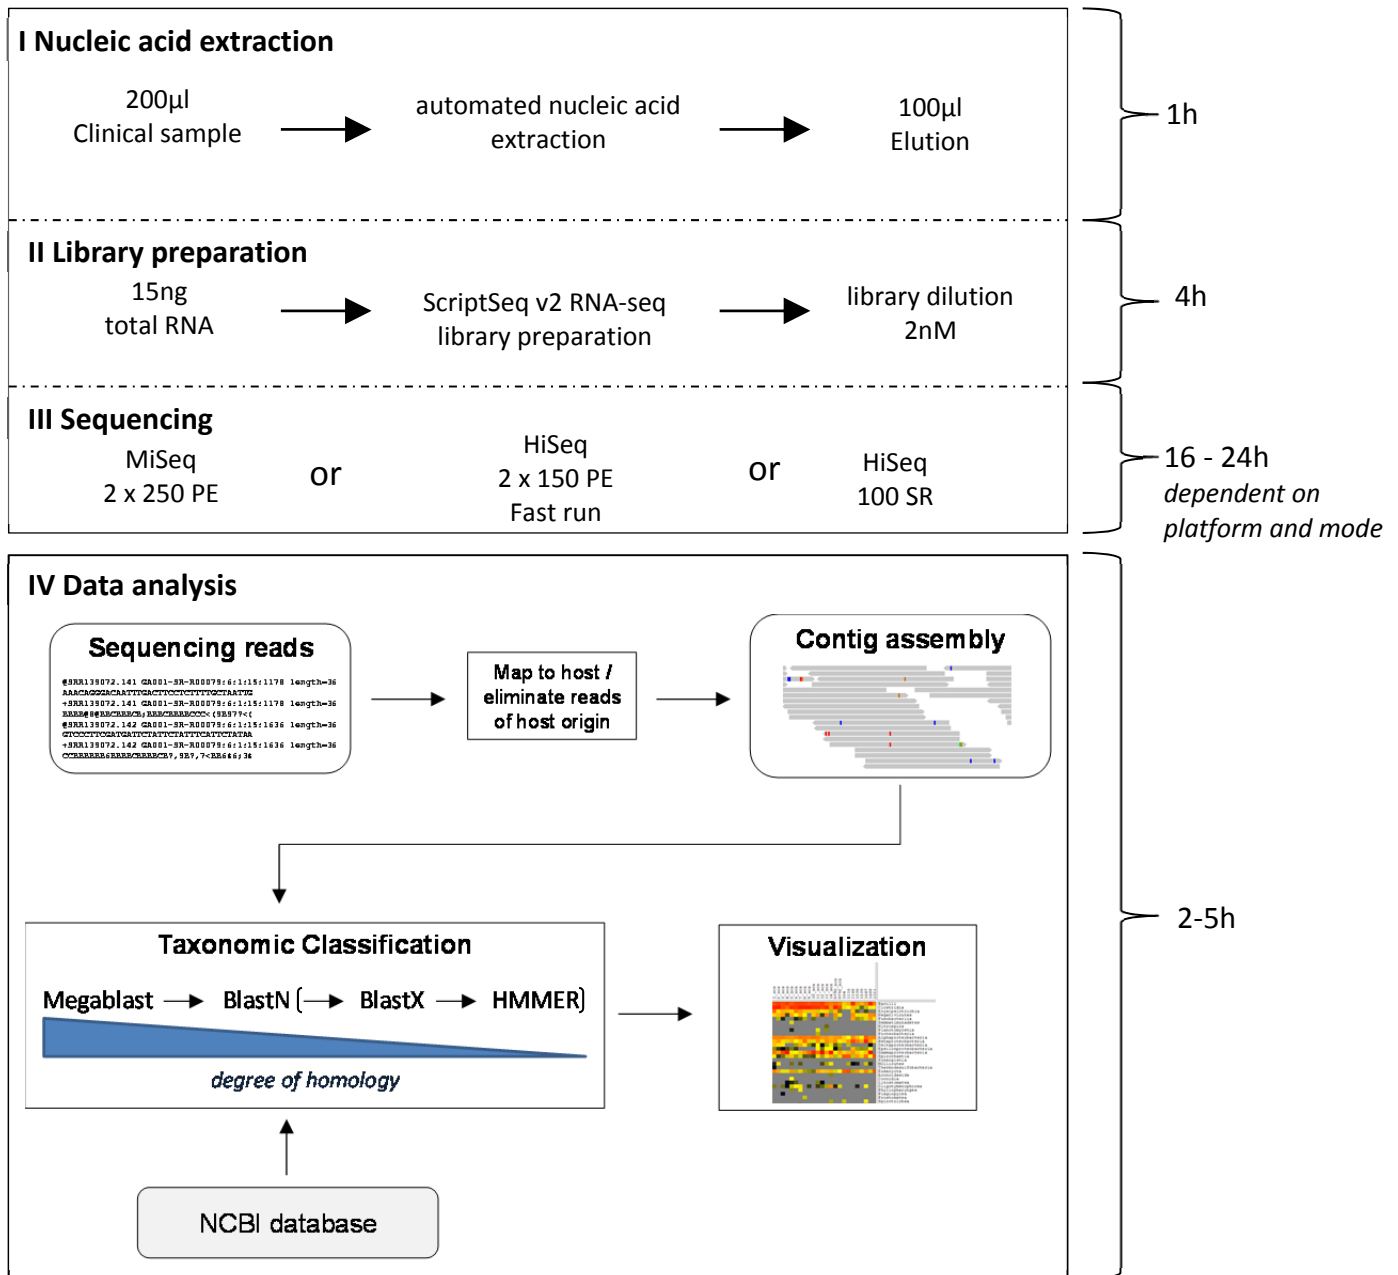

**Supplementary Figure S1:** Summary of workflow and turnaround time of the individual experimental steps including nucleic acid extraction, strand specific RNA library preparation, sequencing on Illumina MiSeq (2 x 250bp paired end, PE), HiSeq2500 (2 x 150bp paired end, fast run mode) or HiSeq2500 (2 x 100bp single read, SR) and bioinformatic data analysis. HiSeq fast run mode was not used in this current study. To allow detection of distantly related infectious agents with a low degree of nucleic acid sequence homology, our data analysis pipeline features optional BlastX and HMMER modules. These modules, however, were not used in the current study, allowing data analysis to complete within 2-5h. Processing time is increased by an additional 5 to 12h if the optional modules are used.

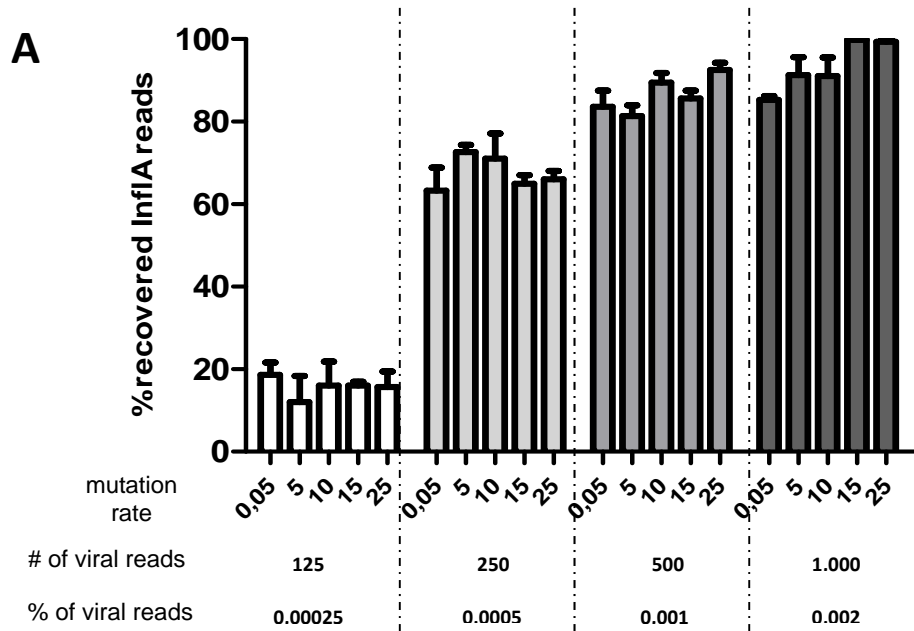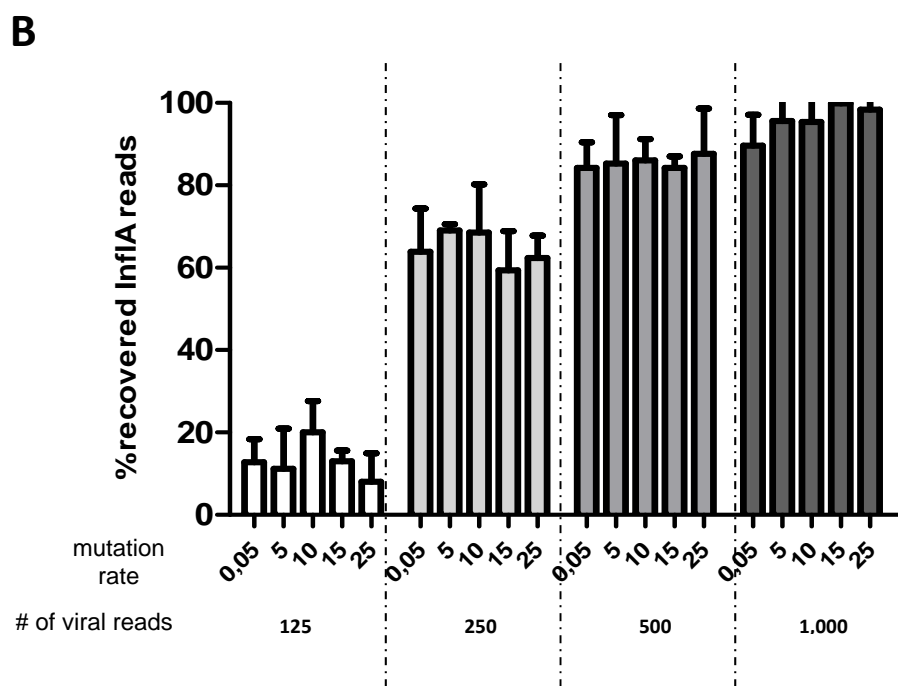

**Supplementary Figure S2:** Summary of in silico modeling (N=3, shown are mean and standard deviation) to assess sensitivity of bioinformatic analysis. (A) Percentage of InflA reads recovered from datasets with the indicated number of influenza virus reads in a background of 50,000,000 reads generated from the transcriptome dataset of the five influenza virus negative BAL samples. The relative percentage of influenza virus reads is given under the absolute numbers. The mutation rate of simulated viral reads is shown under each column. (B) Percentage of InflA reads recovered from datasets simulated as described in (A), but without the transcriptome background reads.

**Supplementary Table S1:** Summary on next generation sequencing data.

| sample ID | diagnostic entity | instrument | total reads | host-subtracted reads | assembled contigs | filtered contigs <sup>a</sup> |             |                           |                            |
|-----------|-------------------|------------|-------------|-----------------------|-------------------|-------------------------------|-------------|---------------------------|----------------------------|
|           |                   |            |             |                       |                   | count                         | mean length | mapped reads <sup>b</sup> | % of host-subtracted reads |
| 1         | BAL               | HiSeq2500  | 10,311,953  | 4,326,057             | 510,402           | 526                           | 459         | 477,937                   | 11.05%                     |
| 2         | BAL               | HiSeq2500  | 31,998,422  | 10,158,889            | 911,694           | 892                           | 435         | 2,189,332                 | 21.55%                     |
| 3         | BAL               | HiSeq2500  | 31,953,379  | 13,744,104            | 1,582,838         | 2,288                         | 422         | 1,111,019                 | 8.08%                      |
| 4         | BAL               | HiSeq2500  | 28,914,182  | 25,253,498            | 1,416,064         | 369                           | 418         | 1,942,973                 | 7.69%                      |
| 5         | BAL               | HiSeq2500  | 34,164,253  | 15,246,183            | 1,316,248         | 2,459                         | 424         | 2,405,066                 | 15.77%                     |
| 104       | BAL               | HiSeq2500  | 25,448,729  | 5,737,099             | 2,409,216         | 454                           | 472         | 121,433                   | 2.12%                      |
| 755       | BAL               | HiSeq2500  | 44,689,504  | 11,604,195            | 5,181,101         | 1,603                         | 448         | 292,452                   | 2.52%                      |
| 1116      | BAL               | HiSeq2500  | 163,412,609 | 39,234,172            | 17,953,404        | 591                           | 397         | 78,788                    | 0.20%                      |
| 1721      | BAL               | HiSeq2500  | 27,376,970  | 5,937,090             | 2,822,768         | 444                           | 464         | 69,980                    | 1.18%                      |
| 2535      | BAL               | HiSeq2500  | 27,472,868  | 13,945,264            | 2,338,182         | 2,589                         | 464         | 5,920,737                 | 42.46%                     |
| 2292      | BAL               | MiSeq      | 2,226,054   | 359,262               | 328,567           | 16                            | 1,456       | 5,657                     | 1.57%                      |
| 3157      | BAL               | MiSeq      | 3,265,314   | 2,050,238             | 1,175,340         | 2,799                         | 511         | 520,512                   | 25.39%                     |
| 1773      | Sputum            | HiSeq2500  | 41,415,879  | 24,508,834            | 3,504,725         | 7,410                         | 538         | 3,025,434                 | 12.34%                     |
| 1168      | Sputum            | HiSeq2500  | 42,593,701  | 42,100,823            | 1,919,424         | 10,778                        | 659         | 32,065,730                | 76.16%                     |
| 853       | Sputum            | HiSeq2500  | 37,054,250  | 35,908,502            | 2,216,129         | 17,233                        | 761         | 29,404,598                | 81.89%                     |
| 677       | Sputum            | HiSeq2500  | 32,506,338  | 21,491,354            | 2,138,304         | 6,851                         | 532         | 16,857,606                | 78.44%                     |
| 208       | Sputum            | HiSeq2500  | 34,784,935  | 33,981,137            | 2,361,555         | 16,196                        | 679         | 20,163,035                | 59.34%                     |
| 2373      | Swap              | HiSeq2500  | 46,324,162  | 43,280,574            | 2,261,922         | 10,700                        | 567         | 32,703,053                | 75.56%                     |
| 2098      | Swap              | HiSeq2500  | 46,201,878  | 23,212,954            | 2,060,429         | 4,210                         | 470         | 2,462,994                 | 10.61%                     |
| 1689      | Swap              | HiSeq2500  | 35,621,107  | 35,299,029            | 2,010,101         | 15,287                        | 718         | 24,644,607                | 69.82%                     |
| 1647      | Swap              | HiSeq2500  | 48,790,100  | 20,794,370            | 2,435,447         | 2,191                         | 444         | 1,250,890                 | 6.02%                      |
| 1539      | Swap              | HiSeq2500  | 29,303,419  | 22,675,081            | 3,496,423         | 8,378                         | 607         | 16,325,608                | 72.00%                     |
| 1538      | Swap              | HiSeq2500  | 40,436,634  | 16,932,677            | 6,839,715         | 2,222                         | 545         | 1,925,912                 | 11.37%                     |
| 768       | Swap              | HiSeq2500  | 34,117,546  | 32,397,096            | 2,752,299         | 18,227                        | 695         | 23,913,343                | 73.81%                     |
| 83        | Swap              | MiSeq      | 1,742,025   | 390,535               | 268,103           | 24                            | 979         | 2,822                     | 0.72%                      |
| 848       | Swap              | MiSeq      | 1,695,921   | 350,382               | 129,072           | 26                            | 908         | 101,128                   | 28.86%                     |
| 2295      | Swap              | HiSeq2500  | 51,133,693  | 49,932,909            | 6,032,741         | 17,889                        | 515         | 32,416,062                | 64.92%                     |
| 2544      | Swap              | HiSeq2500  | 38,427,200  | 35,076,719            | 2,533,128         | 29,688                        | 613         | 24,287,397                | 69.24%                     |
| 14087     | secretion         | MiSeq      | 3,538,581   | 1,673,576             | 583,224           | 818                           | 574         | 745,420                   | 44.54%                     |

<sup>a</sup> contigs with a minimal length of 300 or 400 bp for HiSeq or MiSeq datasets, respectively<sup>b</sup> total number of host-subtracted reads mapped back to assembled contigs

**Supplementary Table S2: Summary on sample composition.**

| sample | diagnostic entity | instrument | % host reads | reads per million mapped reads (RPM): <sup>a</sup> |         |         |               |
|--------|-------------------|------------|--------------|----------------------------------------------------|---------|---------|---------------|
|        |                   |            |              | bacteria                                           | viruses | fungi   | unknown seqs. |
| 1      | BAL               | HiSeq2500  | 58.24%       | 96,040                                             | 5,248   | 389     | 329,960       |
| 2      | BAL               | HiSeq2500  | 68.48%       | 732,419                                            | 1,768   | 427     | 95,070        |
| 3      | BAL               | HiSeq2500  | 57.13%       | 89,569                                             | 80,729  | 33,574  | 407,247       |
| 4      | BAL               | HiSeq2500  | 13.06%       | 310,900                                            | 186,358 | 0       | 209,521       |
| 5      | BAL               | HiSeq2500  | 55.50%       | 210,577                                            | 7,359   | 179,863 | 175,017       |
| 104    | BAL               | HiSeq2500  | 77.78%       | 7,099                                              | 212,348 | 35,262  | 175,017       |
| 755    | BAL               | HiSeq2500  | 74.10%       | 805,459                                            | 2,835   | 0       | 63,901        |
| 1116   | BAL               | HiSeq2500  | 76.00%       | 19,432                                             | 1,193   | 1,168   | 594,684       |
| 1721   | BAL               | HiSeq2500  | 78.47%       | 80,409                                             | 116,190 | 0       | 64,404        |
| 2535   | BAL               | HiSeq2500  | 49.40%       | 916,464                                            | 24      | 146     | 59,273        |
| 2292   | BAL               | MiSeq      | 83.86%       | 545,519                                            | 356,373 | 29,521  | 68,588        |
| 3157   | BAL               | MiSeq      | 37.24%       | 276,824                                            | 5,178   | 425,454 | 27,533        |
| 1773   | Sputum            | HiSeq2500  | 40.91%       | 903,929                                            | 57,562  | 878     | 8,217         |
| 1168   | Sputum            | HiSeq2500  | 1.20%        | 996,584                                            | 210     | 37      | 1,378         |
| 853    | Sputum            | HiSeq2500  | 3.15%        | 992,253                                            | 24      | 77      | 900           |
| 677    | Sputum            | HiSeq2500  | 33.97%       | 98,296                                             | 48      | 893,643 | 2,140         |
| 208    | Sputum            | HiSeq2500  | 2.34%        | 962,474                                            | 29      | 130     | 1,635         |
| 2373   | Swap              | HiSeq2500  | 6.62%        | 664,920                                            | 93      | 321,710 | 2,199         |
| 2098   | Swap              | HiSeq2500  | 50.11%       | 650,740                                            | 9,147   | 851     | 167,559       |
| 1689   | Swap              | HiSeq2500  | 0.93%        | 990,775                                            | 23      | 1,606   | 1,254         |
| 1647   | Swap              | HiSeq2500  | 57.74%       | 366,297                                            | 37,692  | 2,696   | 385,947       |
| 1539   | Swap              | HiSeq2500  | 22.67%       | 4,829                                              | 73      | 52,070  | 624           |
| 1538   | Swap              | HiSeq2500  | 58.26%       | 19,695                                             | 4,495   | 63,385  | 4,085         |
| 768    | Swap              | HiSeq2500  | 5.09%        | 966,477                                            | 37      | 198     | 1,460         |
| 83     | Swap              | MiSeq      | 77.58%       | 863,926                                            | 93,196  | 0       | 42,877        |
| 848    | Swap              | MiSeq      | 79.34%       | 999,446                                            | 208     | 0       | 0             |
| 2295   | Swap              | HiSeq2500  | 2.61%        | 961,139                                            | 550     | 8       | 4,504         |
| 2544   | Swap              | HiSeq2500  | 8.78%        | 980,301                                            | 8       | 0       | 1,707         |
| 14087  | secretion         | MiSeq      | 52.71%       | 962,951                                            | 19      | 299     | 36,542        |

<sup>a</sup>relative abundance of viral and fungal sequences, as well as sequences of unknown origin, is shown as normalized numbers of reads per million mapped reads of non-host origin (RPM).

**Supplementary Table S3: Recovery of viral reads from simulated datasets in a background of 50,000,000 reads generated from a transcriptome dataset.**

| number<br>/percentage of<br>influenza reads<br>mutation rate : |       | 125 / 0.00025 % |    |    |    |    | 250 / 0.0005 % |     |     |     |     | 500 / 0.001 % |     |     |     |     | 1,000 / 0.002 % |      |      |      |      |
|----------------------------------------------------------------|-------|-----------------|----|----|----|----|----------------|-----|-----|-----|-----|---------------|-----|-----|-----|-----|-----------------|------|------|------|------|
|                                                                |       | 0.05            | 5  | 10 | 15 | 25 | 0.05           | 5   | 10  | 15  | 25  | 0.05          | 5   | 10  | 15  | 25  | 0.05            | 5    | 10   | 15   | 25   |
| HA                                                             | H1N1  | 11              | 6  |    |    |    | 27             |     | 26  | 9   | 21  |               | 10  | 57  | 56  | 65  |                 |      |      | 130  | 130  |
|                                                                |       | 8               |    |    | 10 |    | 14             | 27  | 22  | 21  | 14  | 54            |     | 11  | 65  | 57  |                 |      |      | 129  | 130  |
| NA                                                             | H1N1  | 10              |    | 9  | 10 |    | 20             | 26  | 27  | 20  | 12  | 37            | 54  | 54  | 50  | 43  | 88              | 107  | 107  | 107  | 107  |
|                                                                |       | 9               |    | 7  | 8  |    | 22             | 14  | 20  | 14  | 16  | 47            | 54  | 54  | 46  | 54  | 107             | 107  | 107  | 107  | 107  |
| PA                                                             | H1N1  |                 |    |    |    | 8  | 21             | 40  | 28  | 37  | 33  | 78            | 82  | 81  | 79  | 82  | 164             | 163  | 164  | 164  | 164  |
|                                                                |       |                 |    |    |    |    | 33             |     | 23  | 22  | 28  | 78            | 60  | 74  | 81  | 81  | 164             | 164  | 164  | 164  | 164  |
|                                                                | H1N2  |                 | 8  | 9  |    |    | 38             | 22  | 27  | 32  | 18  | 82            | 69  | 64  | 75  | 67  | 164             | 164  | 164  | 164  | 164  |
|                                                                | H3N2  |                 |    |    | 8  |    |                |     | 8   |     | 13  |               |     |     |     |     |                 |      |      |      |      |
| PB 1                                                           | H1N1  | 7               |    |    |    | 7  | 41             | 35  | 31  | 23  | 19  | 86            | 85  | 78  | 64  | 79  | 173             | 173  | 173  | 173  | 173  |
|                                                                |       |                 |    |    | 8  | 8  | 17             | 29  | 16  |     | 31  | 43            | 78  | 82  | 53  | 86  | 173             | 173  | 173  | 173  |      |
|                                                                | H3N2  |                 | 7  | 9  | 7  |    | 17             | 29  | 29  | 32  | 17  | 70            | 72  | 78  | 82  | 80  | 173             | 173  | 173  | 173  | 173  |
|                                                                | H1N2  |                 |    |    |    |    |                |     |     |     | 4   |               |     |     | 8   |     |                 |      |      |      |      |
|                                                                | H3N8  |                 |    |    |    |    |                |     |     |     | 9   |               |     |     |     |     |                 |      |      |      |      |
|                                                                | H11N9 |                 |    |    |    |    |                |     |     |     | 6   |               |     |     |     |     |                 |      |      | 173  |      |
| PB 2                                                           | H1N1  |                 |    |    | 10 | 7  | 21             | 38  | 33  | 28  | 29  | 77            | 73  | 75  | 74  | 81  | 174             | 174  | 174  | 174  | 174  |
|                                                                |       |                 |    |    | 7  |    | 36             | 17  | 18  | 30  | 15  | 110           | 87  | 80  | 64  | 61  | 163             | 174  | 164  | 174  | 174  |
|                                                                | H3N2  |                 |    |    |    |    | 10             | 34  | 23  |     | 33  | 70            | 80  | 74  | 74  | 66  | 174             | 174  | 174  | 174  | 174  |
|                                                                | H7N2  |                 |    |    |    |    |                |     |     | 10  | 5   |               |     |     |     |     |                 |      |      |      |      |
|                                                                | N1    |                 |    |    |    |    |                |     |     |     |     |               |     |     |     | 21  |                 |      |      |      |      |
|                                                                | H1N2  |                 |    |    |    |    |                |     |     | 11  |     |               |     |     |     |     |                 |      |      |      |      |
| NP                                                             | H1N1  |                 |    |    |    | 7  |                |     |     | 11  |     |               |     |     |     |     |                 |      |      |      |      |
|                                                                |       |                 |    |    |    |    | 23             | 16  | 28  | 19  |     | 55            | 57  | 50  | 44  | 47  | 114             | 114  | 114  | 112  | 114  |
|                                                                | H3N2  |                 |    |    |    |    | 12             | 20  | 16  | 27  | 23  | 56            | 57  | 55  | 50  | 58  | 114             | 114  | 114  | 114  | 114  |
|                                                                | H1N2  |                 |    |    |    |    | 13             | 16  | 27  | 21  | 13  | 57            | 52  | 57  | 57  | 57  | 114             | 114  | 114  | 114  | 70   |
|                                                                | H1N2  |                 |    |    |    |    |                |     |     |     |     |               |     |     |     | 2   |                 |      |      |      | 26   |
| M                                                              | H1N1  |                 |    |    |    |    | 19             | 19  |     | 16  | 14  | 37            | 37  | 37  | 37  | 37  | 74              | 74   | 74   | 74   | 74   |
|                                                                |       |                 |    |    |    |    | 11             | 19  | 18  | 6   |     | 37            | 37  | 37  | 37  |     | 52              | 74   | 74   | 74   | 74   |
|                                                                | H3N2  |                 |    |    |    |    | 13             | 16  | 8   | 13  | 19  | 25            | 37  | 37  |     |     | 74              | 74   | 74   | 74   | 74   |
|                                                                | H1N2  |                 |    |    |    |    |                |     |     | 16  | 19  |               |     |     |     | 37  |                 |      |      |      | 37   |
| NS                                                             | H1N1  |                 |    |    |    |    |                |     |     | 6   |     |               |     |     |     | 37  |                 |      |      |      |      |
|                                                                |       |                 |    |    |    |    | 12             | 15  | 16  |     | 13  | 32            | 32  | 32  | 31  |     | 64              | 64   | 64   | 64   | 64   |
|                                                                | H1N2  |                 |    |    |    |    | 7              | 13  |     | 16  |     | 32            | 32  | 32  | 32  | 3   | 64              | 64   | 64   | 64   | 64   |
|                                                                | H3N2  |                 |    |    |    |    | 12             | 16  | 16  | 16  | 16  | 32            | 32  | 32  | 32  | 20  | 64              | 64   | 64   | 64   | 64   |
| Polymerase Subunit                                             | H1N2  |                 |    |    |    |    | 3              |     |     |     |     |               |     |     |     | 16  |                 |      |      |      |      |
| sum                                                            |       |                 |    |    |    |    |                |     |     | 15  |     |               |     |     |     | 32  |                 |      |      |      |      |
|                                                                |       | 28              | 6  | 9  | 20 | 29 | 184            | 189 | 205 | 167 | 155 | 402           | 430 | 464 | 443 | 468 | 851             | 869  | 870  | 998  | 1000 |
|                                                                |       | 16              | 8  | 17 | 18 | 16 | 155            | 178 | 153 | 152 | 170 | 457           | 405 | 425 | 428 | 473 | 837             | 870  | 860  | 999  | 1000 |
|                                                                |       | 26              | 31 | 34 | 22 | 14 | 136            | 177 | 175 | 167 | 170 | 396           | 385 | 452 | 412 | 446 | 870             | 1000 | 1000 | 1000 | 98.2 |

**Shown are the numbers of 3 independent simulations of recovered influenza reads from a datasets of 50,000,000 transcriptome reads (generated from the RNASeq experiments of five InflA negative BAL samples. Different fractions of viral reads (see numbers/percentages in top row) at the indicated mutation rates were used. The viral genome segments and genotypes to which the viral reads were mapped are shown to the left. For each segment and genotype, the number of recovered viral reads as observed in three independently performed simulations is given on a separate line. See supplementary Fig. S2A for a graphical representation of the table data.**

**Supplementary Table S4: Recovery of viral reads from simulated datasets without any background reads.**

| number of influenza reads |      | 125  |   |    |    |    | 250  |     |     |     |     | 500  |     |     |     |     | 1,000 |     |      |     |      |     |
|---------------------------|------|------|---|----|----|----|------|-----|-----|-----|-----|------|-----|-----|-----|-----|-------|-----|------|-----|------|-----|
| mutation rate :           |      | 0.05 | 5 | 10 | 15 | 25 | 0.05 | 5   | 10  | 15  | 25  | 0.05 | 5   | 10  | 15  | 25  | 0.05  | 5   | 10   | 15  | 25   |     |
| HA                        | H1N1 | 11   |   | 7  | 10 |    | 25   |     | 26  | 9   | 21  | 54   | 65  | 50  | 57  | 65  | 130   | 130 | 130  | 130 | 130  |     |
|                           | N1   | 5    |   |    |    |    | 21   | 21  | 10  |     | 14  | 19   |     | 11  | 12  | 55  |       |     | 130  | 130 | 130  |     |
| NA                        | H1N1 | 10   | 6 | 9  | 10 |    | 20   | 26  | 26  | 20  | 12  | 46   | 54  | 54  | 50  | 43  | 88    | 107 | 107  | 107 | 107  |     |
|                           |      |      |   | 7  | 8  |    | 22   | 14  | 20  | 14  | 16  | 47   | 54  | 54  | 46  | 54  | 107   | 107 | 107  | 107 | 107  |     |
|                           |      |      |   | 9  |    |    | 12   | 15  | 18  | 7   | 16  | 54   | 43  | 54  | 43  | 54  | 107   | 107 | 107  | 107 | 107  |     |
| PA                        | H1N1 |      |   | 7  |    |    | 27   | 38  | 28  | 34  | 33  | 70   | 82  | 81  | 66  | 82  | 164   | 163 | 164  | 164 | 164  |     |
|                           |      |      |   | 12 | 9  |    | 33   |     | 23  | 22  | 28  | 78   | 60  | 74  | 81  | 81  | 164   | 164 | 164  | 164 | 164  |     |
|                           |      |      |   |    |    |    | 38   | 22  | 27  | 26  | 4   | 82   | 69  | 60  | 75  | 67  | 164   | 164 | 164  | 164 | 164  |     |
|                           | H1N2 |      |   |    |    |    |      | 21  |     |     |     |      |     |     |     |     |       |     |      |     |      |     |
|                           | H3N2 |      |   |    |    |    |      | 8   |     |     |     |      |     |     |     |     |       |     |      |     |      |     |
| PB 1                      | H1N1 |      |   |    |    | 7  | 41   | 35  | 31  | 28  | 19  | 86   | 85  | 78  | 64  | 79  | 173   | 173 | 173  | 173 | 173  |     |
|                           |      |      |   |    |    | 8  | 17   | 29  | 19  |     | 17  | 71   | 78  | 85  | 62  | 86  | 173   | 173 | 173  | 155 | 7    |     |
|                           |      |      |   |    |    | 9  | 17   | 29  | 29  | 32  | 17  | 70   | 72  | 81  | 75  | 71  | 173   | 173 | 173  | 173 | 173  |     |
|                           |      | H3N2 |   |    |    |    |      |     |     |     |     |      |     |     |     | 8   |       |     |      |     |      |     |
|                           |      | H7N2 |   |    |    |    |      |     |     |     | 6   |      |     |     |     |     |       |     |      |     |      |     |
|                           |      | H1N2 |   |    |    |    |      |     |     |     | 16  | 10   |     |     |     |     |       |     |      |     | 18   | 166 |
|                           |      | H3N8 |   |    |    |    | 7    |     |     |     |     |      |     |     |     |     |       |     |      |     |      |     |
| PB 2                      | H1N1 |      |   |    | 10 |    | 21   | 20  | 33  | 26  | 29  | 77   | 79  | 75  | 74  | 81  | 174   | 174 | 174  | 174 | 174  |     |
|                           |      | 9    | 7 |    |    |    | 36   | 17  | 18  | 30  | 15  | 119  | 87  | 80  | 64  | 61  | 163   | 174 | 164  | 174 | 174  |     |
|                           |      |      |   |    |    |    | 10   | 34  | 23  |     | 33  | 64   | 78  | 74  | 74  | 72  | 174   | 174 | 174  | 174 | 149  |     |
|                           |      | H3N2 |   |    |    |    |      |     |     |     |     |      |     |     |     |     |       |     |      |     |      |     |
|                           |      | H7N2 |   |    |    |    |      |     |     |     | 10  | 5    |     |     |     |     |       |     |      |     |      |     |
|                           |      | N1   |   |    |    |    |      |     |     |     |     |      |     |     |     |     | 21    |     |      |     |      |     |
| NP                        | H1N1 |      |   |    |    | 7  | 23   | 16  | 28  |     | 19  | 55   | 57  | 50  | 44  | 47  | 114   | 114 | 114  | 112 | 114  |     |
|                           |      |      |   |    |    |    | 12   | 20  | 16  | 27  | 23  | 56   | 49  | 55  | 50  |     | 114   | 114 | 114  | 114 | 114  |     |
|                           |      | 9    | 8 |    |    |    | 13   | 16  | 16  | 21  | 13  | 57   | 52  | 57  | 57  |     | 114   | 114 | 114  | 114 | 70   |     |
|                           |      | H1   |   |    |    |    |      |     |     |     |     |      |     |     |     | 2   |       |     |      |     |      |     |
|                           | H3N2 |      |   |    |    |    |      |     |     | 10  |     |      |     |     |     | 57  |       |     |      |     | 20   |     |
|                           | H1N2 |      |   |    |    |    |      |     |     |     |     |      |     |     |     |     |       |     |      |     |      |     |
| M                         | H1N1 |      |   |    |    |    | 19   | 19  |     | 16  | 14  | 37   | 37  | 37  | 37  | 37  | 74    | 74  | 74   | 74  | 74   |     |
|                           |      |      |   |    |    |    | 11   | 19  | 18  | 6   |     |      | 37  | 37  | 37  | 37  | 52    | 74  | 74   | 74  | 59   |     |
|                           |      |      |   |    |    |    | 13   | 16  | 6   |     | 19  | 25   | 37  | 37  |     |     | 74    | 74  | 74   | 74  | 74   |     |
|                           |      | H5N1 |   |    |    |    |      |     |     |     |     |      |     |     |     |     |       |     |      |     |      | 15  |
|                           | H3N2 |      |   |    |    |    |      |     |     | 16  |     |      |     |     |     |     |       |     |      |     |      |     |
|                           | H1N2 |      |   |    |    |    |      |     |     |     | 19  |      |     |     |     |     |       |     |      |     | 37   |     |
| NS                        | H1N1 |      |   |    |    |    |      |     |     |     |     |      |     |     |     | 37  |       |     |      |     |      |     |
|                           |      | 8    |   |    |    |    | 12   | 15  |     | 16  | 13  | 32   | 32  | 32  | 26  |     | 64    | 64  | 64   | 64  | 64   |     |
|                           |      | 5    |   |    |    |    | 7    | 13  |     | 16  |     | 32   | 32  | 32  | 32  | 19  | 64    | 64  | 64   | 64  | 64   |     |
|                           | H1N2 |      |   |    |    |    | 12   | 16  | 12  | 16  | 16  | 32   | 32  | 32  | 32  | 20  | 64    | 64  | 64   | 64  | 64   |     |
|                           | H3N2 |      |   |    |    |    |      |     |     |     |     |      |     |     |     |     |       |     |      |     |      |     |
|                           | H1N2 |      |   |    |    |    | 3    |     |     |     |     |      |     |     |     |     |       |     |      |     |      |     |
|                           | H3N2 |      |   |    |    |    |      |     |     | 15  |     |      |     |     |     | 32  |       |     |      |     |      |     |
| Polymerase Subunit        | H1N2 |      |   |    |    |    |      |     |     |     | 15  |      |     |     |     |     |       |     |      |     |      |     |
| sum                       |      | 21   | 6 | 16 | 20 | 14 | 188  | 169 | 204 | 169 | 155 | 403  | 491 | 457 | 426 | 468 | 981   | 999 | 1000 | 998 | 1000 |     |
|                           |      | 8    | 8 | 24 | 18 | 16 | 155  | 171 | 157 | 152 | 170 | 457  | 397 | 428 | 432 | 473 | 837   | 870 | 860  | 999 | 1000 |     |

19 28 35 14 0 | 136 177 152 123 143 | 403 388 406 405 376 | 870 1000 1000 1000 951

**Shown are the numbers of 3 independent simulations of recovered influenza reads.** Different fractions of viral reads (see numbers in top row) were used. The viral genome segments and genotypes to which the viral reads were mapped are shown to the left. For each segment and genotype, the number of recovered viral reads as observed in three independently performed simulations is given on a separate line. See supplementary Fig. S2B for a graphical representation of the table data.

**Supplementary Table S5: Neuraminidase inhibitor resistance mutations.**

|             | 104  | 208  | 1539 | 1538 | 83   | 2292 |
|-------------|------|------|------|------|------|------|
| aa position |      |      |      |      |      |      |
| <b>H1N1</b> |      |      |      |      |      |      |
| Q136K       | -    | -    | -    | -    | -    | -    |
| H275Y       | -    | -    | -    | -    | -    | -    |
| N70S        | +    | +    | +    | +    | +    | +    |
| Y155H       | -    | n.a  | n.a  | n.a  | n.a  | -    |
| I122V/M     | -    | n.a  | -    | n.a  | -    | -    |
| D199N       | -    | n.a. | -    | n.a. | -    | -    |
| I223V       | -    | -    | -    | -    | -    | -    |
|             | 1721 | 1773 | 1647 | 1168 | 3157 | 2098 |
| <b>H3N2</b> |      |      |      |      |      |      |
| N294S       | -    | -    | -    | -    | -    | -    |
| R292K       | -    | -    | -    | -    | -    | -    |
| E119A/D     | -    | -    | -    | -    | -    | -    |
| E119G       | -    | -    | -    | -    | -    | -    |
| E119I       | -    | -    | -    | -    | -    | -    |
| E119V       | -    | -    | -    | -    | -    | -    |
| Q136K       | -    | -    | -    | -    | -    | -    |
| R371K       | -    | -    | -    | -    | -    | -    |
| D151A       | -    | -    | -    | -    | -    | -    |

All H3N2 strains are predicted to be sensitive to Neuraminidase inhibitors (Oseltamivir, Zanamivir, Peramivir). H1N1 strains are likely sensitive to Oseltamivir and Peramivir (H275Y mutation), but showed the N70S mutation which typically mediates medium resistance against Zanamivir (1, 2). n.a.: not applicable



**Supplementary Table S6: Influenza negative samples; NGS data of pathogens known to cause respiratory infections and results of diagnostic culture.**

| ID             | RPM<br>InfIA/InfIB | RPM<br>S.<br>pneum. | RPM<br>Neisseria<br>meningitidis | RPM<br>H.<br>influenzae | RPM<br>M.<br>catarrhalis. | RPM<br>S. aureus | RPM<br>Candida<br>dubliniensis | RPM<br>Candida<br>albicans | RPM<br>E.<br>faecalis | Culture (bacteria;<br>yeast) and PCR<br>for viruses |
|----------------|--------------------|---------------------|----------------------------------|-------------------------|---------------------------|------------------|--------------------------------|----------------------------|-----------------------|-----------------------------------------------------|
| <b>BAL</b>     |                    |                     |                                  |                         |                           |                  |                                |                            |                       |                                                     |
| 1              | -                  | -                   | -                                | -                       | -                         | -                | -                              | -                          | -                     | negative                                            |
| 2              | -                  | -                   | -                                | 699,508                 | -                         | -                | -                              | -                          | -                     | H. influenzae,                                      |
| 3 <sup>a</sup> | -                  | -                   | -                                | -                       | -                         | -                | -                              | 26,419                     | -                     | Candida sp.; RSV                                    |
| 4 <sup>b</sup> | -                  | -                   | -                                | -                       | -                         | -                | -                              | -                          | -                     | Enterococcus sp;<br>Pseudomonas sp.,<br>Rhinovirus  |
| 5              | -                  | -                   | -                                | -                       | -                         | -                | -                              | -                          | -                     | Yeast, Pseudomonas<br>sp. Lactobacillus,            |

Values shown represent normalized number of reads per million mapped reads (RPM).  
a, b: viral pathogens detected, a: RSV 63,941RPM; b: human Rhinovirus A 8,360RPM.

**Supplementary Table S7: Analysis of rRNA sequence contigs**

| sample | rRNA contigs <sup>a</sup> | % of all contigs | rRNA reads <sup>b</sup> | % of all mapped reads | % of reads in rRNA contigs unambiguously assigned on level: <sup>c</sup> |        |       |        |       |         |
|--------|---------------------------|------------------|-------------------------|-----------------------|--------------------------------------------------------------------------|--------|-------|--------|-------|---------|
|        |                           |                  |                         |                       | super-kingdom                                                            | phylum | class | family | genus | species |
| 1      | 26                        | 4.9%             | 27,713                  | 5.80%                 |                                                                          | 12.8%  | 0.7%  | 37.5%  | 10.9% | 38.2%   |
| 2      | 18                        | 2.0%             | 762,195                 | 34.81%                | 0.4%                                                                     |        |       |        | 0.2%  | 99.5%   |
| 3      | 16                        | 0.7%             | 44,564                  | 4.01%                 |                                                                          |        |       |        | 85.2% | 14.8%   |
| 4      | 4                         | 1.1%             | 437,843                 | 22.53%                |                                                                          |        |       |        | 0.1%  | 99.9%   |
| 5      | 24                        | 1.0%             | 586,259                 | 24.38%                | 3.0%                                                                     |        |       |        | 0.6%  | 96.4%   |
| 104    | 9                         | 2.0%             | 273                     | 0.22%                 |                                                                          |        |       | 9.2%   |       | 90.8%   |
| 755    | 32                        | 2.0%             | 201,514                 | 68.90%                | 0.3%                                                                     |        |       | 0.2%   | 0.1%  | 99.4%   |
| 1116   | 6                         | 1.0%             | 306                     | 0.39%                 | 57.8%                                                                    |        |       | 19.6%  | 9.2%  | 13.4%   |
| 1721   | 19                        | 4.3%             | 2,050                   | 2.93%                 | 20.2%                                                                    |        |       |        | 11.0% | 68.8%   |
| 2535   | 41                        | 1.6%             | 2,766,365               | 46.72%                | 0.0%                                                                     |        | 0.0%  | 0.0%   | 3.6%  | 96.4%   |
| 2292   | 3                         | 18.8%            | 1,502                   | 26.55%                |                                                                          |        |       |        |       | 100.0%  |
| 3157   | 13                        | 0.5%             | 155,896                 | 29.95%                |                                                                          | 0.1%   |       |        |       | 99.9%   |
| 1773   | 39                        | 0.5%             | 1,216,704               | 40.22%                |                                                                          | 0.0%   | 0.1%  |        | 3.4%  | 96.6%   |
| 1168   | 47                        | 0.4%             | 8,983,773               | 28.02%                |                                                                          |        |       | 0.1%   | 28.2% | 71.7%   |
| 853    | 43                        | 0.2%             | 2,231,156               | 7.59%                 | 0.7%                                                                     |        |       |        | 14.8% | 84.5%   |
| 677    | 26                        | 0.4%             | 5,857,447               | 34.75%                |                                                                          |        |       |        | 0.5%  | 99.5%   |
| 208    | 51                        | 0.3%             | 2,888,938               | 14.33%                | 0.0%                                                                     |        | 2.5%  | 2.7%   | 27.5% | 67.3%   |
| 2373   | 56                        | 0.5%             | 2,010,084               | 6.15%                 | 9.3%                                                                     |        |       | 23.9%  | 1.2%  | 65.6%   |
| 2098   | 21                        | 0.5%             | 1,252,535               | 50.85%                |                                                                          |        |       | 0.5%   | 0.8%  | 98.7%   |
| 1689   | 46                        | 0.3%             | 4,746,334               | 19.26%                | 6.7%                                                                     |        |       | 0.1%   | 9.3%  | 83.9%   |
| 1647   | 25                        | 1.1%             | 147,774                 | 11.81%                | 0.3%                                                                     |        |       |        | 24.8% | 74.9%   |
| 1539   | 34                        | 0.4%             | 117,881                 | 0.72%                 | 1.1%                                                                     |        |       |        | 5.9%  | 93.0%   |
| 1538   | 18                        | 0.8%             | 1,679,115               | 87.19%                | 0.0%                                                                     |        |       |        | 0.0%  | 100.0%  |
| 768    | 49                        | 0.3%             | 3,239,936               | 13.55%                | 1.2%                                                                     |        |       | 1.0%   | 8.4%  | 89.4%   |
| 83     | 6                         | 25.0%            | 2,292                   | 81.22%                | 0.4%                                                                     |        |       |        | 1.4%  | 98.2%   |
| 848    | 6                         | 23.1%            | 49,350                  | 48.80%                |                                                                          |        |       |        | 0.2%  | 99.8%   |
| 2295   | 64                        | 0.4%             | 8,988,490               | 27.73%                | 1.4%                                                                     |        | 2.6%  |        | 22.3% | 73.6%   |
| 2544   | 37                        | 0.1%             | 3,785,736               | 15.59%                | 0.0%                                                                     | 8.9%   |       |        | 26.5% | 64.6%   |
| 14087  | 15                        | 1.8%             | 198,810                 | 26.67%                |                                                                          |        |       |        |       | 100.0%  |

<sup>a</sup> number of sequence contigs exhibiting significant homology to ribosomal RNAs (see material and methods for details)

<sup>b</sup> total number of reads mapped to ribosomal sequence contigs

<sup>c</sup> percentage of reads (of all reads mapped to ribosomal contigs) from contigs that can be unambiguously assigned at or below each of the indicated taxonomic levels

## Supplementary References

1. **Deyde VM, Sheu TG, Trujillo AA, Okomo-Adhiambo M, Garten R, Klimov AI, Gubareva LV.** 2010. Detection of molecular markers of drug resistance in 2009 pandemic influenza A (H1N1) viruses by pyrosequencing. *Antimicrob Agents Chemother* **54**:1102-1110.
2. **Kamali A, Holodniy M.** 2013. Influenza treatment and prophylaxis with neuraminidase inhibitors: a review. *Infect Drug Resist* **6**:187-198.
